# Supplementary material
Source: HighWire-hosted journal article supplement (https://jnm.snmjournals.org/highwire/filestream/104715/field_highwire_adjunct_files/0/262395_Supplemental_Data.pdf)
Supplement: 262395_Supplemental_Data.pdf [file 262395_Supplemental_Data.pdf]

**Supplemental TABLE 1**

**PET/CT results in function of biology, history, localization and histopathology**

|      | <b>Ca</b> | <b>P</b> | <b>PTH</b> | <b>History</b>         | <b>Previous imaging</b> | <b><sup>11</sup>C-MET</b> | <b><sup>18</sup>F-FCH<sub>E</sub></b> | <b><sup>18</sup>F-FCH<sub>L</sub></b> | <b>Surgical localization</b> | <b>Histology</b> |
|------|-----------|----------|------------|------------------------|-------------------------|---------------------------|---------------------------------------|---------------------------------------|------------------------------|------------------|
| P1   | 2.76      | 0.68     | 95         |                        |                         | 2                         | 2                                     | 2                                     | P4R                          | PA               |
| P2   | 2.66      | 0.92     | 53         |                        |                         | 0                         | 2                                     | 2                                     |                              |                  |
| P3   | 2.79      | 0.9      | 140        |                        | US                      | 0                         | 0                                     | 0                                     |                              |                  |
| P4   | 2.58      | 0.87     | 71         | GH macroadenoma        | US                      | 2/1/0/1                   | 2/2/1/1                               | 2/2/1/1                               | P3L                          | PH               |
| P5   | 2.85      | 0.73     | 42         | fracture               | US/Neck CT              | 2                         | 2                                     | 2                                     | P4L                          | PA               |
| P6   | 2.64      | 0.52     | 72         | RC/hypercalciuria      | US/Chest CT             | 2/1                       | 2/2                                   | 2/2                                   |                              |                  |
| P7   | 2.81      | 0.87     | 49         |                        | US/Neck MRI             | 1                         | 2                                     | 2                                     | P3R                          | PA               |
| P8†  | 3.0       | NA       | 163        | surgery                | US                      | 2                         | 2                                     | 2                                     | P3L                          | PA               |
| P9*  | 2.57      | 0.87     | 48         | surgery/RC             | US                      | 0                         | 2                                     | 2                                     | P3R                          | PH               |
| P10  | 2.6       | 1.1      | 92         | OP/hypercalciuria      | US                      | 0/0                       | 2/1                                   | 2/1                                   |                              |                  |
| P11  | 2.72      | 0.56     | 71         |                        | US                      | 1                         | 1                                     | 1                                     |                              |                  |
| P12  | 2.57      | 0.55     | 61         | CM/Crohn               | US                      | 0                         | 2                                     | 2                                     |                              |                  |
| P13  | 2.94      | 0.36     | 150        | RC/OP/hypercalciuria   | US                      | 2                         | 2                                     | 2                                     | P4R                          | PA               |
| P14  | 2.75      | 0.78     | 29         |                        |                         | 0                         | 0                                     | 0                                     |                              |                  |
| P15  | 2.64      | 0.53     | 46         | surgery                | US                      | 0                         | 0                                     | 0                                     | P3R                          | PA               |
| P17  | 2.97      | 0.75     | 160        | hypercalciuria         |                         | 2                         | 2                                     | 0                                     | Intrathyroidal IR            | PA               |
| P20  | 2.62      | 0.71     | 50         | hypercalciuria/Basedow | US                      | 2                         | 2                                     | 2                                     | P3L                          | PA               |
| P21* | 2.88      | 0.86     | 81         | RC/OP/hypercalciuria   | US                      | 2                         | 2                                     | 2                                     | P3L (+P4)                    | PA (+ 2 PH)      |
| P22  | 3.23      | 0.63     | 530        |                        |                         | 2                         | 2                                     | 2                                     | P3R                          | PA               |
| P23  | 2.6       | 0.88     | 73         | OP/hypercalciuria      | US/Neck CT              | 1                         | 2                                     | 2                                     |                              |                  |
| P24  | 2.56      | 0.99     | 43         | Thyroid surgery        |                         | 0                         | 1                                     | 1                                     |                              |                  |
| P25  | 2.88      | 0.99     | 142        |                        | US                      | 1                         | 2                                     | 2                                     | ectopic                      | PA (+ PH)        |
| P26  | 2.67      | 0.63     | 52         | RC/OP/Hashimoto        | US                      | 1                         | 2                                     | 2                                     | P3L                          | PH               |
| P27  | 2.85      | 0.95     | 40         |                        | US                      | 1                         | 2                                     | 2                                     | P3R                          | PA               |
| P28  | 2.64      | 0.85     | 88         | RC/hypercalciuria      | US                      | 1                         | 2                                     | 2                                     | P3R                          | PA               |
| P29  | 2.7       | 0.87     | 72         | Hashimoto              | US/Neck CT              | 1                         | 1                                     | 2                                     | P3L                          | PA               |
| P30  | 2.82      | 0.74     | 54         | hypercalciuria         |                         | 2/2/0                     | 2/2/0                                 | 2/2/1                                 |                              |                  |

|      |      |      |     |                             |            |       |       |       |                              |                                    |
|------|------|------|-----|-----------------------------|------------|-------|-------|-------|------------------------------|------------------------------------|
| P32  | 2.77 | 0.45 | 54  | OP                          |            | 2     | 2     | 2     | P4L                          | PA                                 |
| P33  | 2.74 | 0.73 | 70  |                             | US         | 2     | 2     | 2     | P3L                          | PA                                 |
| P34  | 2.65 | 0.70 | 60  | CM                          | US/Neck CT | 0     | 0     | 0     |                              |                                    |
| P35  | 2.51 | 0.77 | 56  | hypercalciuria              | US/Neck CT | 0     | 0     | 0     |                              |                                    |
| P36  | 2.59 | 0.73 | 150 | OP                          |            | 2     | 2     | 2     |                              |                                    |
| P37  | 3.35 | 0.66 | 62  | OP/pancreatitis             | NA         | 1     | 2     | 2     | ectopic                      | PA                                 |
| P38  | 2.87 | 0.44 | 100 |                             | US         | 2     | 2     | 2     | P3R                          | PCa                                |
| P39  | 2.54 | 0.72 | 64  | OP                          | US         | 2     | 2     | 2     |                              |                                    |
| P40  | 2.47 | 0.69 | 73  | OP/hypercalciuria           | US/Neck CT | 0     | 1     | 1     |                              |                                    |
| P41  | 2.51 | 0.94 | 78  | CM/hypercalciuria           | US         | 0     | 0     | 0     |                              |                                    |
| P42  | 2.82 | 0.96 | 77  |                             |            | 0     | 0     | 0     |                              |                                    |
| P43  | 2.66 | 0.99 | 244 |                             | NA         | 2/1   | 2/2   | 2/2   |                              |                                    |
| P44  | 2.50 | 0.92 | 40  | CM                          | US         | 1     | 2     | 2     | P3R                          | PA                                 |
| P45  | 2.67 | 0.69 | 62  | HIV                         | US         | 0     | 0     | 0     |                              |                                    |
| P46  | 2.67 | 0.67 | 96  | surgery                     | NA         | 2     | 2     | 2     |                              |                                    |
| P47  | 2.76 | 0.64 | 106 | OP/hypercalciuria/crohn     | US         | 0     | 0     | 0     |                              |                                    |
| P49  | 2.67 | 0.67 | 79  | Surgery/OP/pheochromocytoma |            | 2     | 2     | 2     | P4R                          | PA                                 |
| P50* | 2.63 | 0.59 | 114 |                             | Chest CT   | 2/0/0 | 2/2/2 | 2/2/2 | P3R/ P4R/<br>P4L             | 3 PA                               |
| P51  | 2.71 | 0.82 | 101 | surgery                     | US         | 2     | 2     | 2     | P3R                          | Normal gland                       |
| P52  | 2.59 | 0.7  | 116 | hypercalciuria              |            | 2     | 2     | 2     |                              |                                    |
| P53  | 2.65 | 1.05 | 49  | surgery                     |            | 2     | 2     | 2     |                              |                                    |
| P54  | 2.65 | 0.35 | 279 | CM/breast-ovarian cancer    | US         | 2/2/2 | 2/2/2 | 2/2/2 | P3L/<br>Intrathyroidal<br>IL | bifocal<br>PCa/<br>unexplored<br>R |
| P55  | 2.77 | 0.70 | 55  | hypercalciuria              | NA         | 0     | 1     | 1     |                              |                                    |
| P56  | 2.65 | 0.84 | 133 |                             | US         | 1     | 2     | 2     |                              |                                    |
| P57  | 2.78 | 0.77 | 51  |                             | US         | 2     | 2     | 2     |                              |                                    |
| P58  | 2.62 | 0.69 | 35  | RC/OP                       | US         | 1     | 1     | 0     |                              |                                    |

Px=patient x, Ca=serum calcium, P=serum phosphorus, PTH=parathyroid hormone, GH= growth hormone, RC=renal colic, CM=calcimimetic drug, surgery=parathyroidectomy, OP=osteopenia/-porosis, US=neck ultrasonography, CT= CT scanner, MRI=magnetic resonance imaging, NA=not available, <sup>11</sup>C-MET=<sup>11</sup>C-Methionine, <sup>18</sup>F-FCH<sub>E/L</sub>=<sup>18</sup>F-Fluorocholine early/late, Scores 0=negative; 1=inconclusive; 2=positive, P3=inferior parathyroid gland, P4=superior parathyroid gland, R=right, L=left, PA=parathyroid adenoma, PH=parathyroid hyperplasia, PCa=parathyroid carcinoma

\* Patients with familial context of multiple endocrine neoplasia or other rare syndrome

**Supplemental TABLE 2**  
**Contingency Tables for <sup>18</sup>F-FCH vs. Histology and <sup>11</sup>C-MET vs. Histology**

| Per lesion resected | Positive <sup>18</sup> F-FCH | Negative <sup>18</sup> F-FCH | Total <sup>18</sup> F-FCH |
|---------------------|------------------------------|------------------------------|---------------------------|
| <b>PA</b>           | 21                           | 1                            | 22                        |
| <b>PH</b>           | 3*                           | 3                            | 6                         |
| <b>PCa</b>          | 3                            | 0                            | 3                         |
| <b>Total</b>        | 27                           | 4                            | 31                        |

\* mismatch in location for a lesion

Sensitivity = 26 / 31 = 84%

PPV = 26 / 29 (FP: 1 mismatch localization, 1 normal gland, 1 thyroid nodule) = 89.6%

Specificity, NPV, Accuracy: NA

| Per lesion resected | Positive <sup>11</sup> C-MET | Negative <sup>11</sup> C-MET | Total <sup>11</sup> C-MET |
|---------------------|------------------------------|------------------------------|---------------------------|
| <b>PA</b>           | 12                           | 10                           | 22                        |
| <b>PH</b>           | 1                            | 5                            | 6                         |
| <b>PCa</b>          | 3                            | 0                            | 3                         |
| <b>Total</b>        | 16                           | 15                           | 31                        |

Sensitivity = 16 / 16 + 15 = 52%

PPV = 16 / 16 + 1 (normal gland) = 94%

Specificity, NPV, Accuracy: NA

PA=parathyroid adenoma, PH=parathyroid hyperplasia, PCa=parathyroid carcinoma, <sup>18</sup>F-FCH=<sup>18</sup>F-Fluorocholine, <sup>11</sup>C-MET=<sup>11</sup>C-Methionine, NA=non applicable

**Supplemental TABLE 3**

| <b>Pitfalls in PET/CT</b> | <b><sup>11</sup>C-MET</b> | <b><sup>18</sup>F-FCH</b> |
|---------------------------|---------------------------|---------------------------|
| Lymph nodes               | +                         | +                         |
| Mediastinal tumor         | +                         | +                         |
| Thyroid nodule            |                           | +                         |
| Oesophagus                | +                         |                           |

<sup>11</sup>C-MET=<sup>11</sup>C-Methionine; <sup>18</sup>F-FCH=<sup>18</sup>F-Fluorocholine

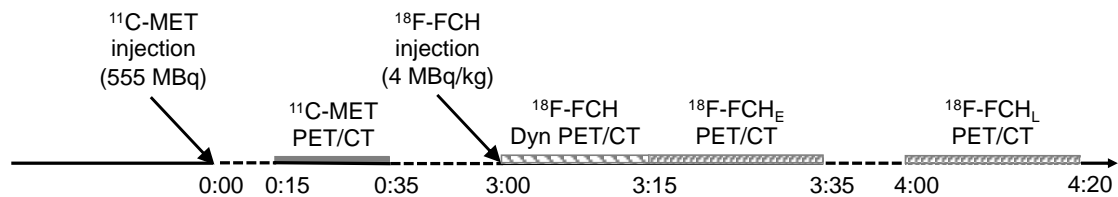

**Supplemental FIGURE 1 – One-day imaging timeline**

Dyn=dynamic,  $^{18}\text{F-FCH}_{(E/L)}$ =  $^{18}\text{F-Fluorocholine}$ (early/late), MBq=Megabecquerel,  $^{11}\text{C-MET}$ = $^{11}\text{C-Methionine}$

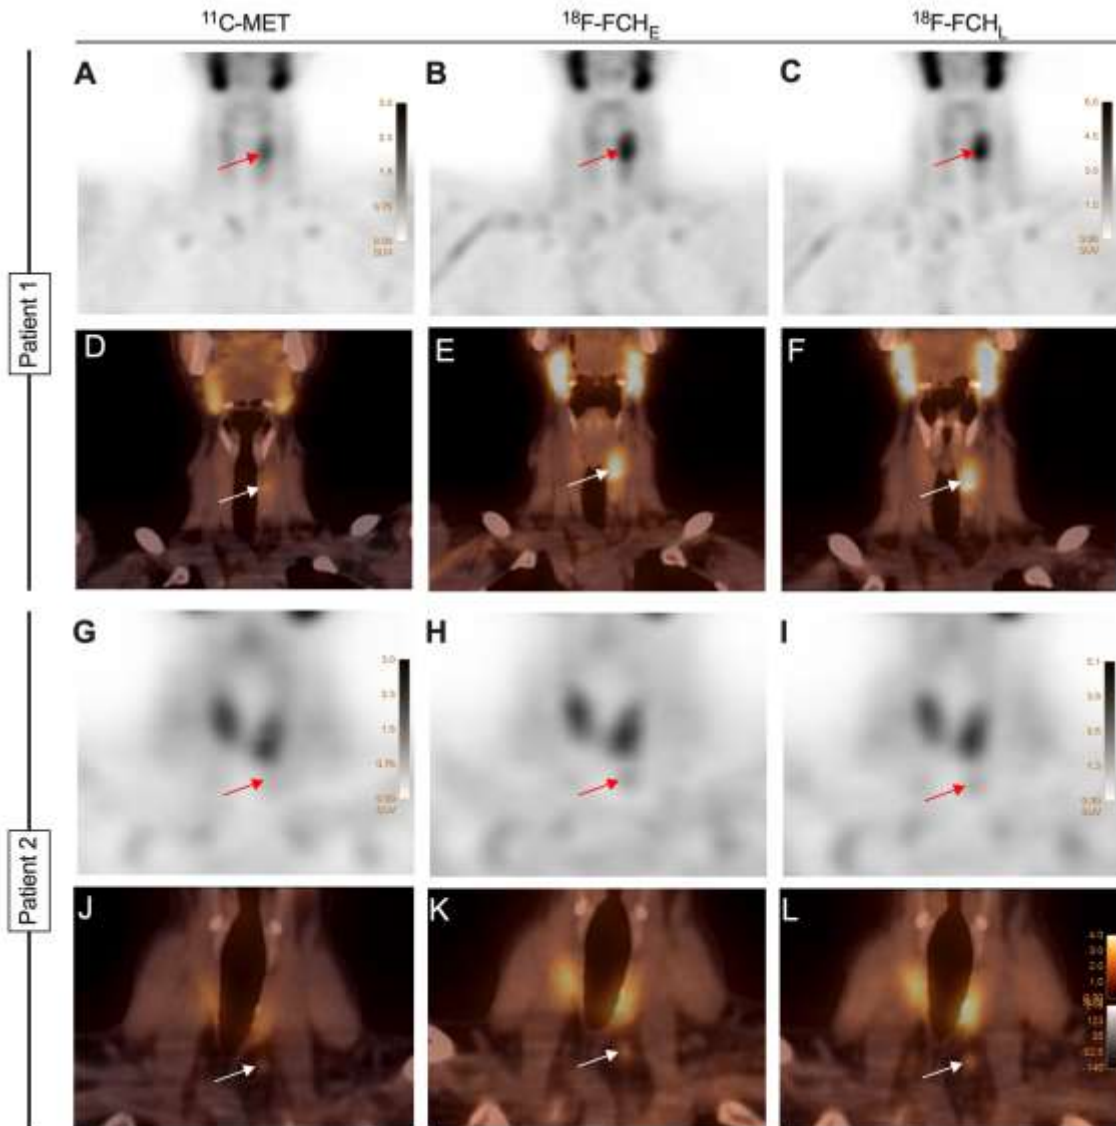

**Supplemental FIGURE 2 –**

**Patient 1:** Coronal PET images (A-D)  $^{11}\text{C-MET}$  (B-E)  $^{18}\text{F-FCH}_E$  and (C-F)  $^{18}\text{F-FCH}_L$  in a 52 y-old female patient with pHPT and negative MIBI SPECT/CT. Moderate  $^{11}\text{C-MET}$  uptake and intense  $^{18}\text{F-FCH}$  uptake (arrows) of a voluminous nodule behind the upper left pole, with a slightly better contrast on late  $^{18}\text{F-FCH}$  images.

**Patient 2:** (G)  $^{11}\text{C-MET}$  compared to (H-I)  $^{18}\text{F-FCH}_E$  and  $^{18}\text{F-FCH}_L$  and respective (J-K-L) fusion images for detection of parathyroid lesion of a 68 y-old female patient with pHPT with negative MIBI SPECT/CT. Negative  $^{11}\text{C-MET}$ -PET/CT but positive early and late  $^{18}\text{F-FCH}$ -PET/CT.

$^{18}\text{F-FCH}_{(E/L)}$  =  $^{18}\text{F-Fluorocholine}$  (early/late),  $^{11}\text{C-MET}$  =  $^{11}\text{C-Methionine}$ , MIBI =  $^{99\text{m}}\text{Tc-sestaMIBI}$  SPECT scintigraphy, pHPT = hyperparathyroidism



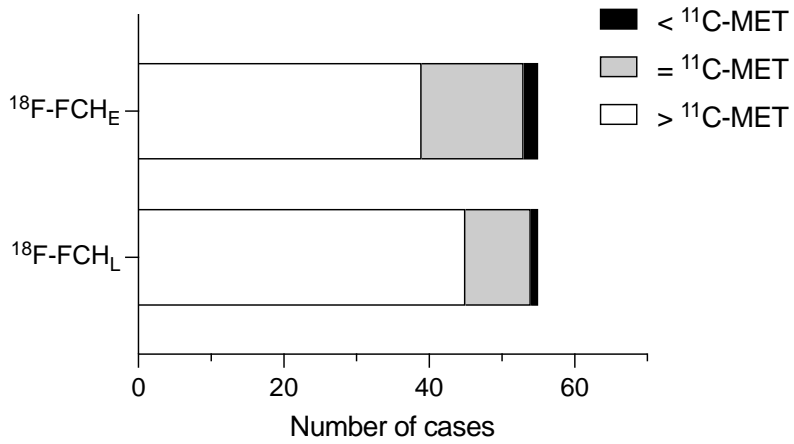

**Supplemental FIGURE 3 – Visual comparison to  $^{11}\text{C-MET}$  uptake on  $^{18}\text{F-FCH}_E$  vs.  $^{18}\text{F-FCH}_L$**

$^{18}\text{F-FCH}_{(E/L)}$  =  $^{18}\text{F-Fluorocholine}$  (early/late),  $^{11}\text{C-MET}$  =  $^{11}\text{C-Methionine}$



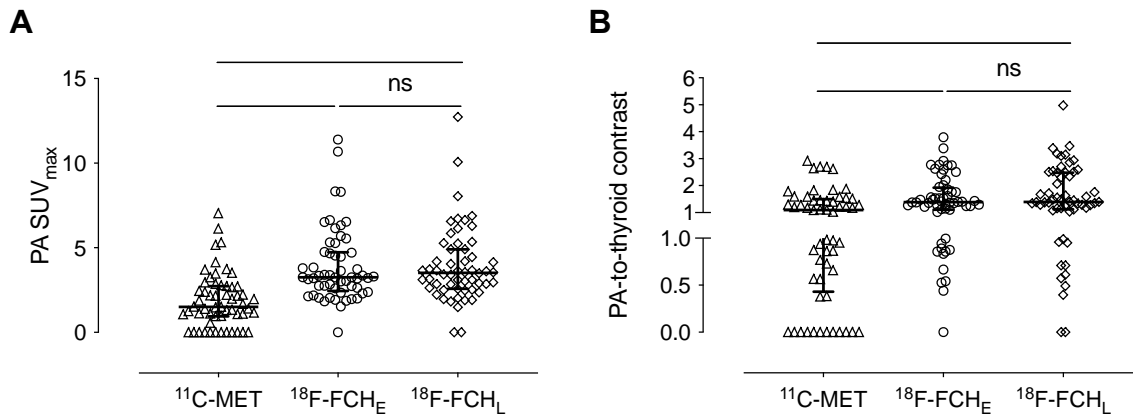

**Supplemental FIGURE 4 – Distribution of SUVmax PA and PA/Thyroid**

<sup>18</sup>F-FCH<sub>(E/L)</sub>= <sup>18</sup>F-Fluorocholeline(early/late), <sup>11</sup>C-MET=<sup>11</sup>C-Methionine, PA=parathyroid lesion  
 \*\*\*\*, p<0.0001
